# Supplementary material for: Adsorption of Mn(ii) ions from wastewater using an AgNPs/GO/chitosan nanocomposite material
Source: Royal Society of Chemistry journal article supplement (doi:10.1039/d2ra04693h), 2022-01-01
Supplement: d2ra04693h1.pdf [file d2ra04693h1.pdf]

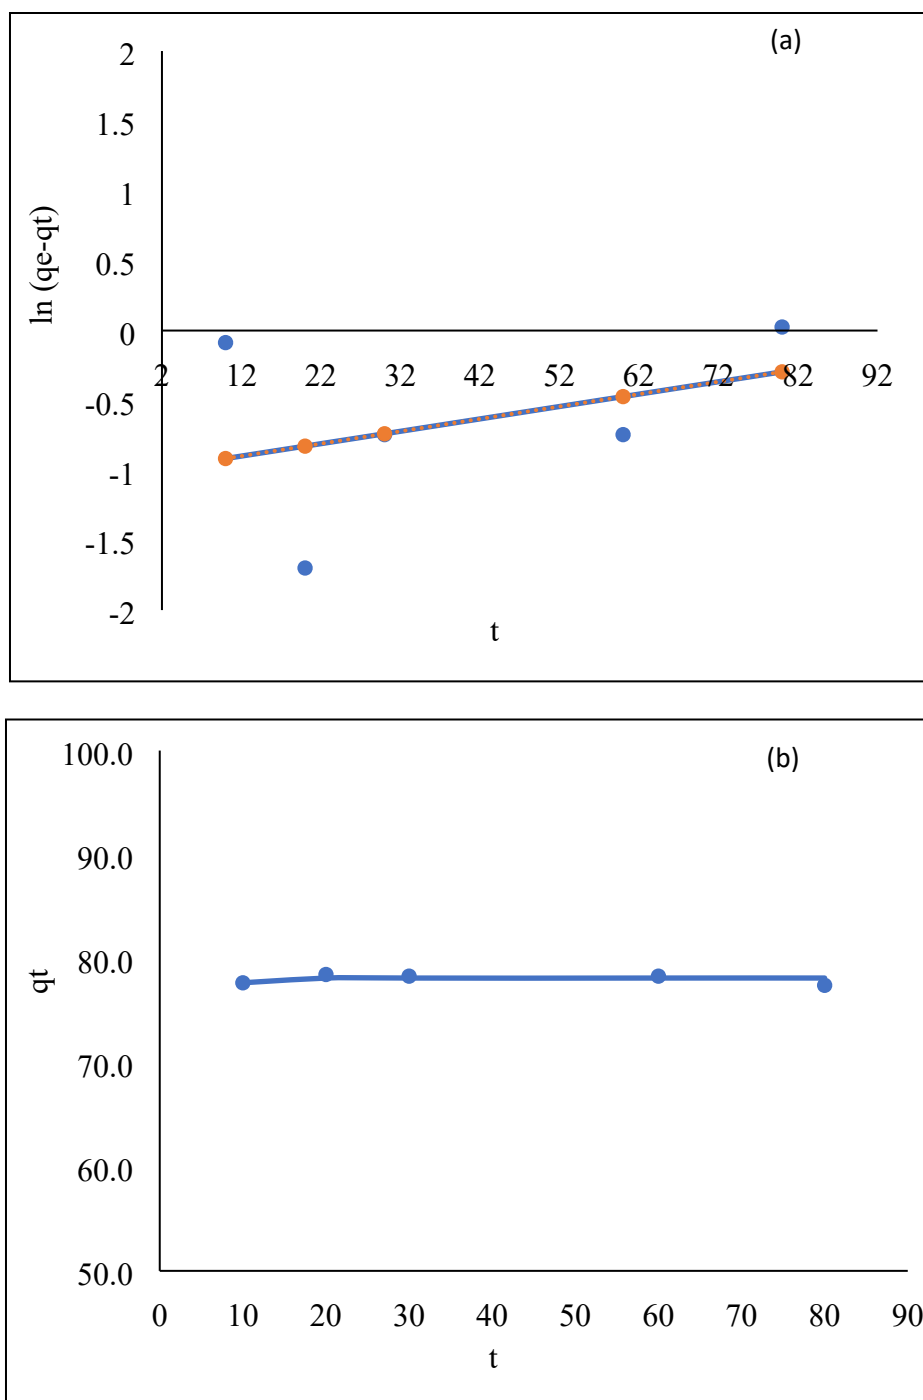

**Figure (1):** Adsorption on AgNP/Go/Chitosan in pseudo-first-order of Mn ions by (a) linear analysis, (b) nonlinear analysis

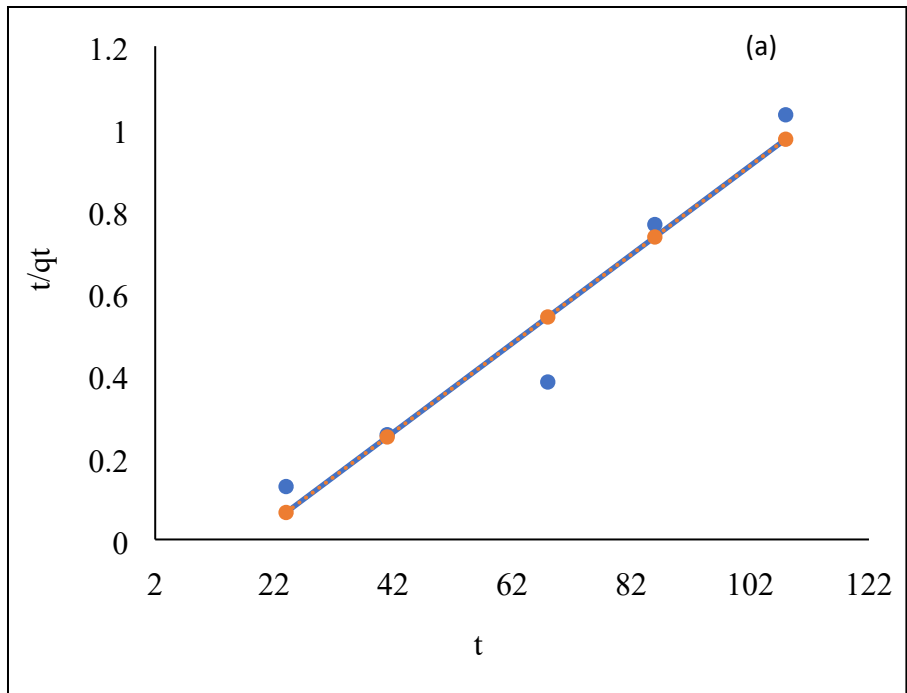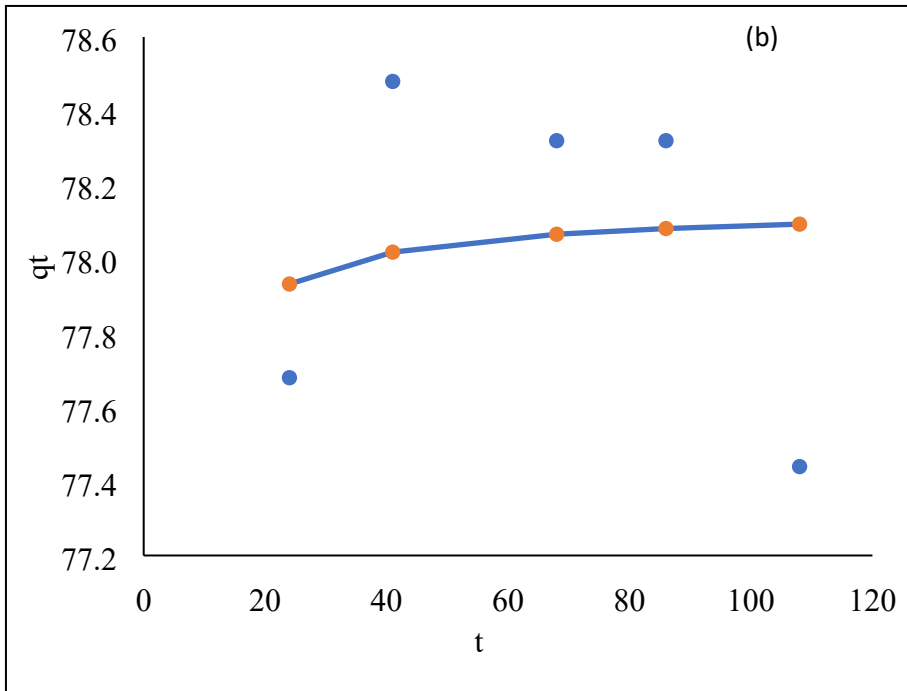

**Figure (2):** Adsorption on AgNP/Go/Chitosan in pseudo-second-order of Mn ions by (a) linear analysis, (b) nonlinear analysis

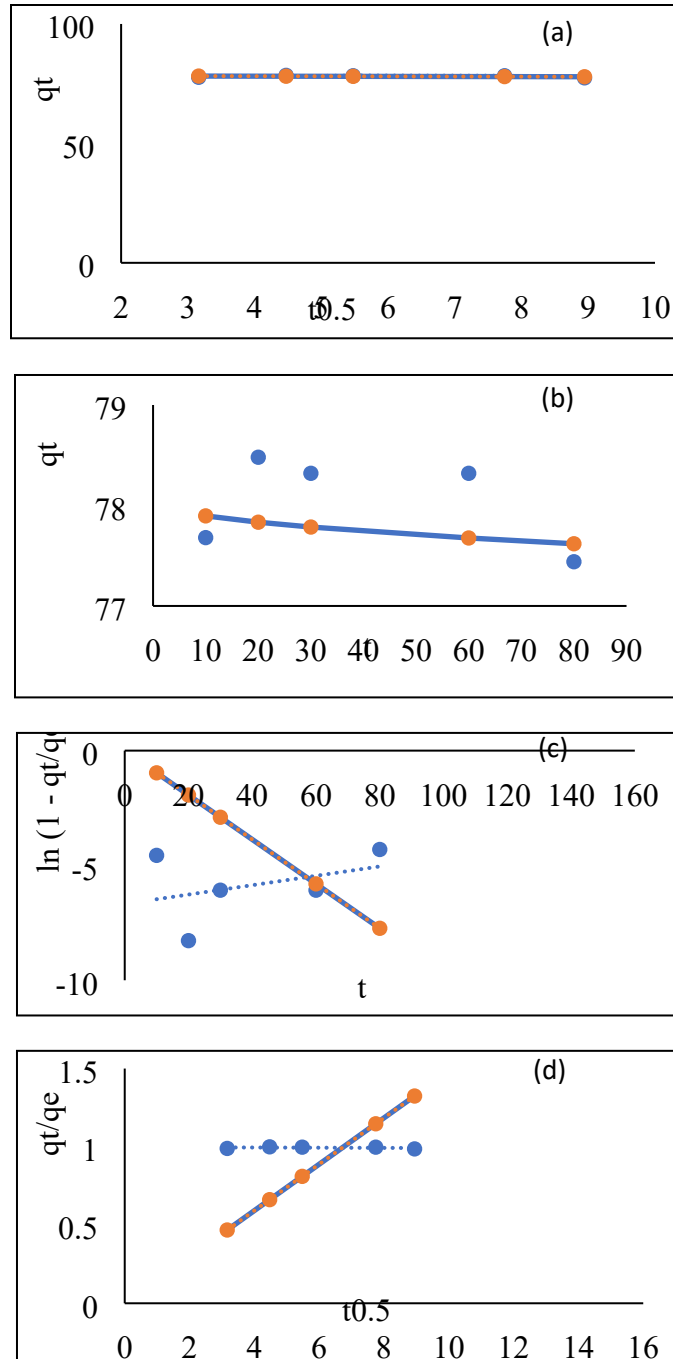

**Figure (3):** kinetic model adsorption on AgNP/Go/Chitosan for Mn ions (a) linear intraparticle diffusion, (b) nonlinear intraparticle diffusion, (c) Pore diffusion (d) film diffusion.
